# Supplementary material for: The protective effect of thymoquinone on tert-butylhydroquinone induced cytotoxicity in human umbilical vein endothelial cells
Source: Royal Society of Chemistry journal article supplement (doi:10.1039/c9tx00235a), 2019-11-01
Supplement: c9tx00235a1.pdf [file c9tx00235a1.pdf]

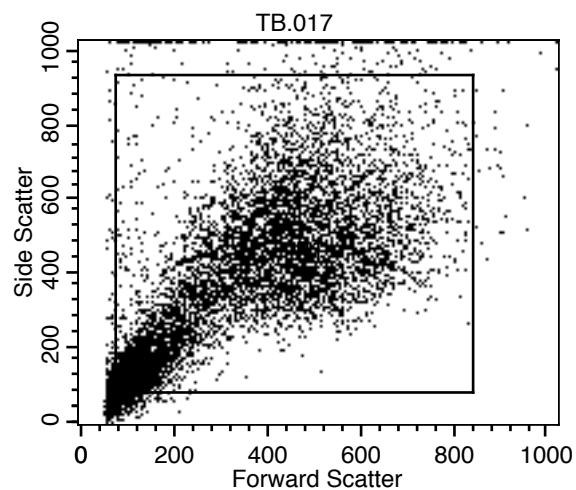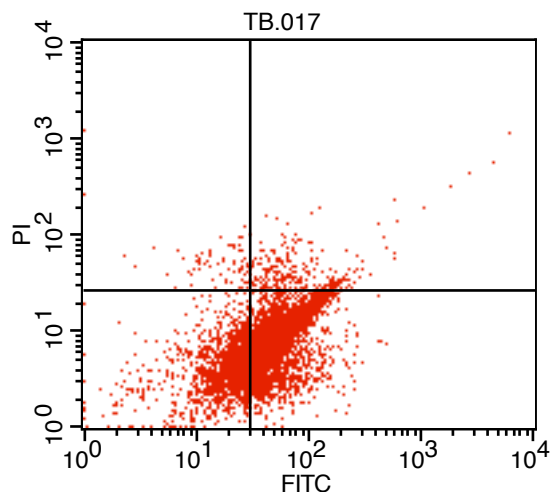

#### Quadrant Statistics

File: TB.017                      Log Data Units: Linear Values  
Sample ID:                      Patient ID:  
Tube: Untitled                  Panel: Untitled Acquisition Tube List  
Acquisition Date: 17-May-18      Gate: G1  
Gated Events: 8102              Total Events: 10000  
X Parameter: FITC (Log)          Y Parameter: PI (Log)  
Quad Location: 30, 26

| Quad | Events | % Gated | % Total | X Mean | X Geo Mean | Y Mean | Y Geo Mean |
|------|--------|---------|---------|--------|------------|--------|------------|
| UL   | 80     | 0.99    | 0.80    | 17.95  | 15.11      | 69.15  | 52.45      |
| UR   | 281    | 3.47    | 2.81    | 160.75 | 86.76      | 52.99  | 42.08      |
| LL   | 1563   | 19.29   | 15.63   | 18.99  | 16.83      | 4.59   | 3.83       |
| LR   | 6178   | 76.25   | 61.78   | 63.67  | 59.20      | 9.60   | 8.40       |
